# Supplementary material for: Structural and optoelectronic properties of C60 rods obtained via a rapid synthesis route
Source: Royal Society of Chemistry journal article supplement (doi:10.1039/b609074e), 2006-01-01
Supplement: b609074e.pdf [file b609074e.pdf]

## Supplementary Information

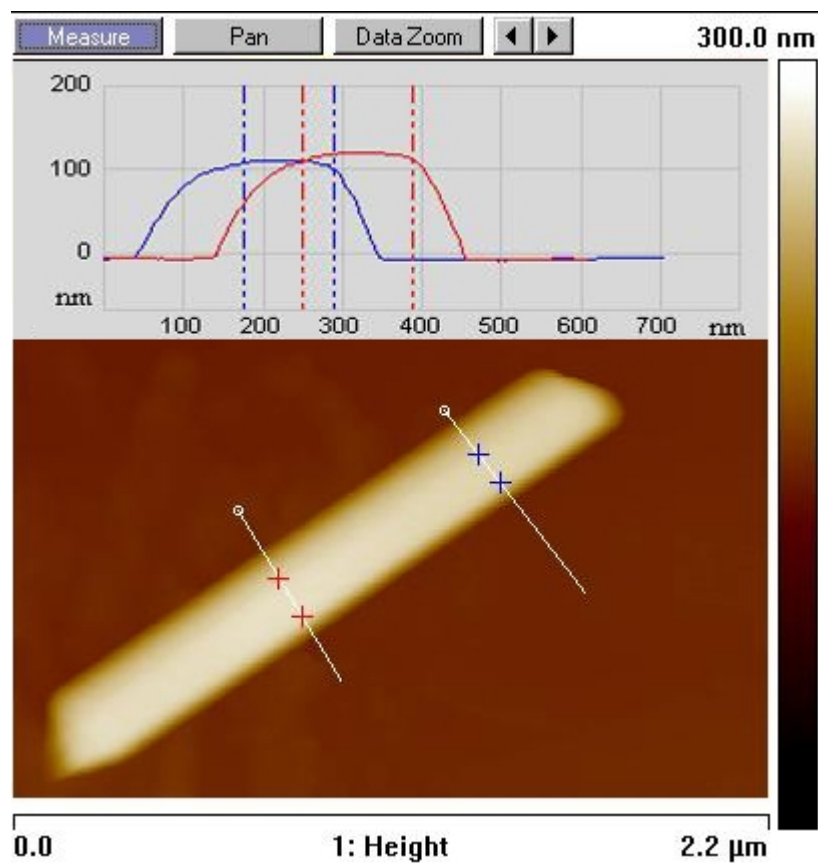

Figure S1. AFM profile of the sample. Note that only the height information is reliable and the plateau shown in the height profile clearly reflects the faceted feature of the rods.
